# Supplementary material
Source: PubMed Central journal article supplement (PMC10191647)
Supplement: boe-14-5-2276-s001.pdf [file boe-14-5-2276-s001.pdf]

## Dynamics of single cell femtosecond laser printing: supplement

**JUN ZHANG,<sup>1,2,3,4</sup> CHRISTINE FRANK,<sup>1</sup> PATRICK BYERS,<sup>1</sup> SASA DJORDJEVIC,<sup>1</sup> DENITSA DOCHEVA,<sup>4</sup> HAUKE CLAUSEN-SCHAUMANN,<sup>2,3,5</sup> STEFANIE SUDHOP,<sup>2,3</sup> AND HEINZ P. HUBER<sup>1,2,6</sup> **

<sup>1</sup>Lasercenter, Munich University of Applied Sciences, Lothstrasse 34, 80335 Munich, Germany

<sup>2</sup>Center for Applied Tissue Engineering and Regenerative Medicine CANTER, Munich University of Applied Sciences, Lothstrasse 34, 80335 Munich, Germany

<sup>3</sup>Center for NanoScience, University of Munich, 80799 Munich, Germany

<sup>4</sup>Department of Musculoskeletal Tissue Regeneration, Orthopaedic Hospital König-Ludwig-Haus, University of Wuerzburg, 97076 Wuerzburg, Germany

<sup>5</sup>clausen-schaumann@hm.edu

<sup>6</sup>heinz.huber@hm.edu

---

This supplement published with Optica Publishing Group on 25 April 2023 by The Authors under the terms of the [Creative Commons Attribution 4.0 License](https://creativecommons.org/licenses/by/4.0/) in the format provided by the authors and unedited. Further distribution of this work must maintain attribution to the author(s) and the published article's title, journal citation, and DOI.

Supplement DOI: <https://doi.org/10.6084/m9.figshare.22494433>

Parent Article DOI: <https://doi.org/10.1364/BOE.480286>

# Jet dynamics study of femtosecond laser-induced single-cell printing

**JUN ZHANG<sup>1,2,3,4</sup>, CHRISTINE FRANK<sup>1</sup>, PATRICK BYERS<sup>1</sup>, SASA DJORDJEVIC<sup>1</sup>, DENITSA DOCHEVA<sup>4</sup>, HAUKE CLAUSEN-SCHAUMANN<sup>2,3,5</sup>, STEFANIE SUDHOP<sup>2,3</sup> AND HEINZ P. HUBER<sup>1,2,6\*</sup>**

<sup>1</sup>Lasercenter, Munich University of Applied Sciences, Lothstrasse 34, 80335 Munich, Germany

<sup>2</sup>Center for Applied Tissue Engineering and Regenerative Medicine CANTER, Munich University of Applied Sciences, Lothstrasse 34, 80335 Munich, Germany

<sup>3</sup>Center for NanoScience, University of Munich, 80799 Munich

<sup>4</sup>Department of Musculoskeletal Tissue Regeneration, Orthopaedic Hospital König-Ludwig-Haus, University of Wuerzburg, 97076 Wuerzburg, Germany

\*<sup>5</sup>[clausen-schaumann@hm.edu](mailto:clausen-schaumann@hm.edu)

\*<sup>6</sup>[heinz.huber@hm.edu](mailto:heinz.huber@hm.edu)

\*[clausen-schaumann@hm.edu](mailto:clausen-schaumann@hm.edu)

## Supplemental document

Table S1. Jet width, velocity and the dimensionless Weber ( $We$ ) and Reynolds ( $Re$ ) numbers of cell-free and cell-laden jets in variation of the laser pulse energy and focus depth. Background colors indicate different hydrodynamic regimes from Figure 7 in the main manuscript.

| $E_p$ [ $\mu$ J] | $F_d$ [ $\mu$ m] | Cell-free jet  |           |         |       |
|------------------|------------------|----------------|-----------|---------|-------|
|                  |                  | $d$ [ $\mu$ m] | $v$ [m/s] | $We$    | $Re$  |
| 2                | 26               | ~10            | >100      | >1500   | >100  |
| 0.4              | 39               | 12.7±1.0       | 7.3±0.6   | 10±2    | 8±1   |
| 2                | 39               | 17±3           | 43±1      | 458±91  | 60±12 |
| 0.4              | 52               | 99±7           | 1.4±0.4   | 2.9±1.7 | 3±0.9 |
| 0.8              | 52               | 14.5±2.0       | 5.6±0.8   | 7±3     | 7±1   |
| 1                | 52               | 35±3           | 7.3±0.2   | 28±3    | 22±2  |
| 1.2              | 52               | 34±1           | 11.8±0.8  | 72±9    | 34±2  |
| 1.4              | 52               | 30±3           | 16.4±1.1  | 118±20  | 40±5  |
| 1.6              | 52               | 31±1           | 17.6±0.8  | 145±15  | 46±3  |
| 2                | 52               | 32±1           | 17.5±0.5  | 144±10  | 46±2  |
| 3                | 52               | 29±1           | 33±1      | 453±35  | 78±4  |
| 4                | 52               | 24±3           | 38±1      | 536±72  | 78±11 |
| 5                | 52               | 18±2           | >100      | >2700   | >150  |
| 7                | 52               | --             | >150      | >3000   | >200  |
| 1.4              | 65               | 20±4           | 8.1±1.3   | 20±7    | 14±3  |
| 2                | 65               | 48±2           | 5.8±0.2   | 24±1    | 23±1  |
| 2                | 78               | 55±5           | 1.4±0.2   | 1.6±0.5 | 6±1   |
| 2.3              | 78               | 24±1           | 8.0±0.5   | 23±3    | 16±1  |

| Cell-laden jet          |                         |                       |               |               |             |
|-------------------------|-------------------------|-----------------------|---------------|---------------|-------------|
| $E_p$ [ $\mu\text{J}$ ] | $F_d$ [ $\mu\text{m}$ ] | $d$ [ $\mu\text{m}$ ] | $v$ [m/s]     | $W_e$         | $R_e$       |
| 2                       | 39                      | 17 $\pm$ 4            | 54 $\pm$ 7    | 745 $\pm$ 260 | 78 $\pm$ 22 |
| 1                       | 52                      | 35 $\pm$ 5            | 6.0 $\pm$ 0.7 | 18 $\pm$ 5    | 17 $\pm$ 3  |
| 2                       | 52                      | 32 $\pm$ 5            | 21 $\pm$ 0.7  | 195 $\pm$ 35  | 52 $\pm$ 9  |
| 3                       | 52                      | 28 $\pm$ 2            | 41 $\pm$ 3    | 690 $\pm$ 122 | 95 $\pm$ 10 |
| 4                       | 52                      | 23 $\pm$ 4            | 48 $\pm$ 2    | 800 $\pm$ 130 | 93 $\pm$ 15 |
| 2                       | 65                      | 48 $\pm$ 1            | 5.9 $\pm$ 0.5 | 25 $\pm$ 4    | 24 $\pm$ 2  |

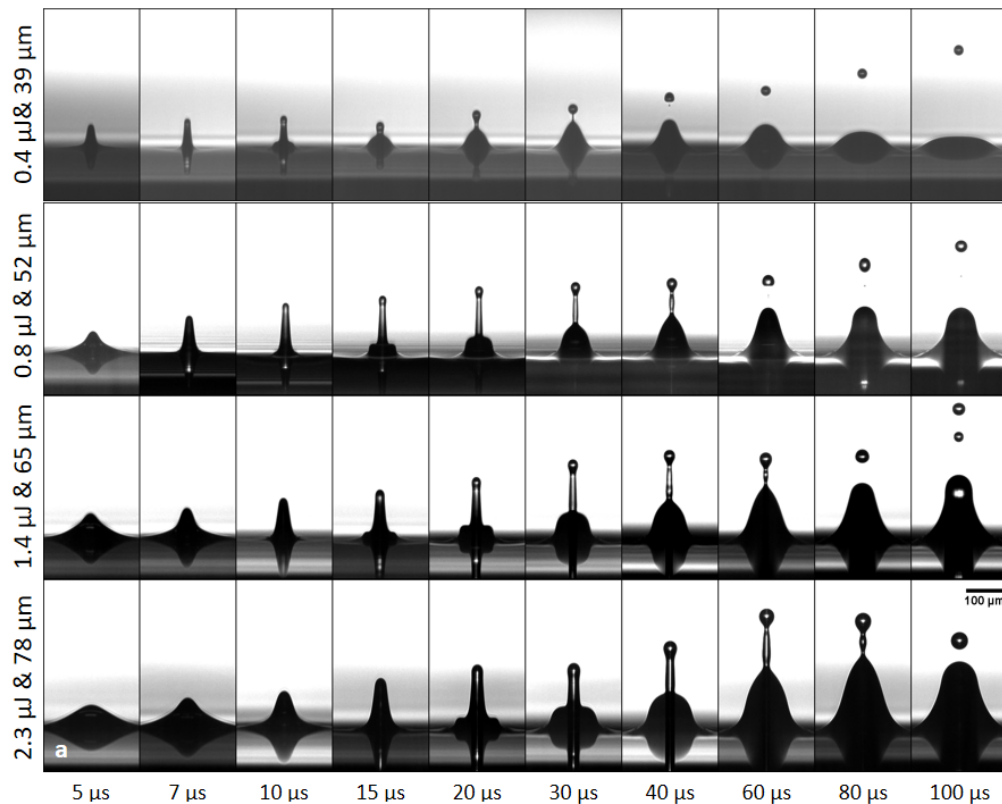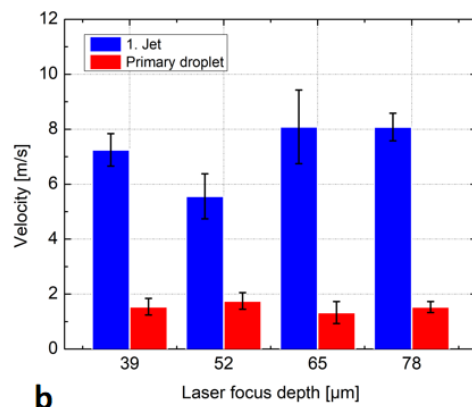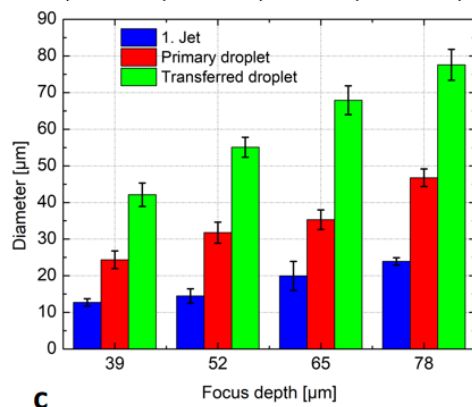

Figure S1. (a) Representative time-resolved images of the breakup process of the first jet by applying the threshold energy to the corresponding focus depth of 39 to 78  $\mu\text{m}$ . (b) Plot of the first jet velocity at 10  $\mu\text{s}$  and separated primary droplet velocity and (c) the diameter of first jet width, primary droplet diameter and transferred spot diameter.
